# Supplementary figures and images for: Multicellular factor analysis of single-cell data for a tissue-centric understanding of disease
Source: eLife journal article supplement (doi:10.7554/elife.93161), 2023-11-22

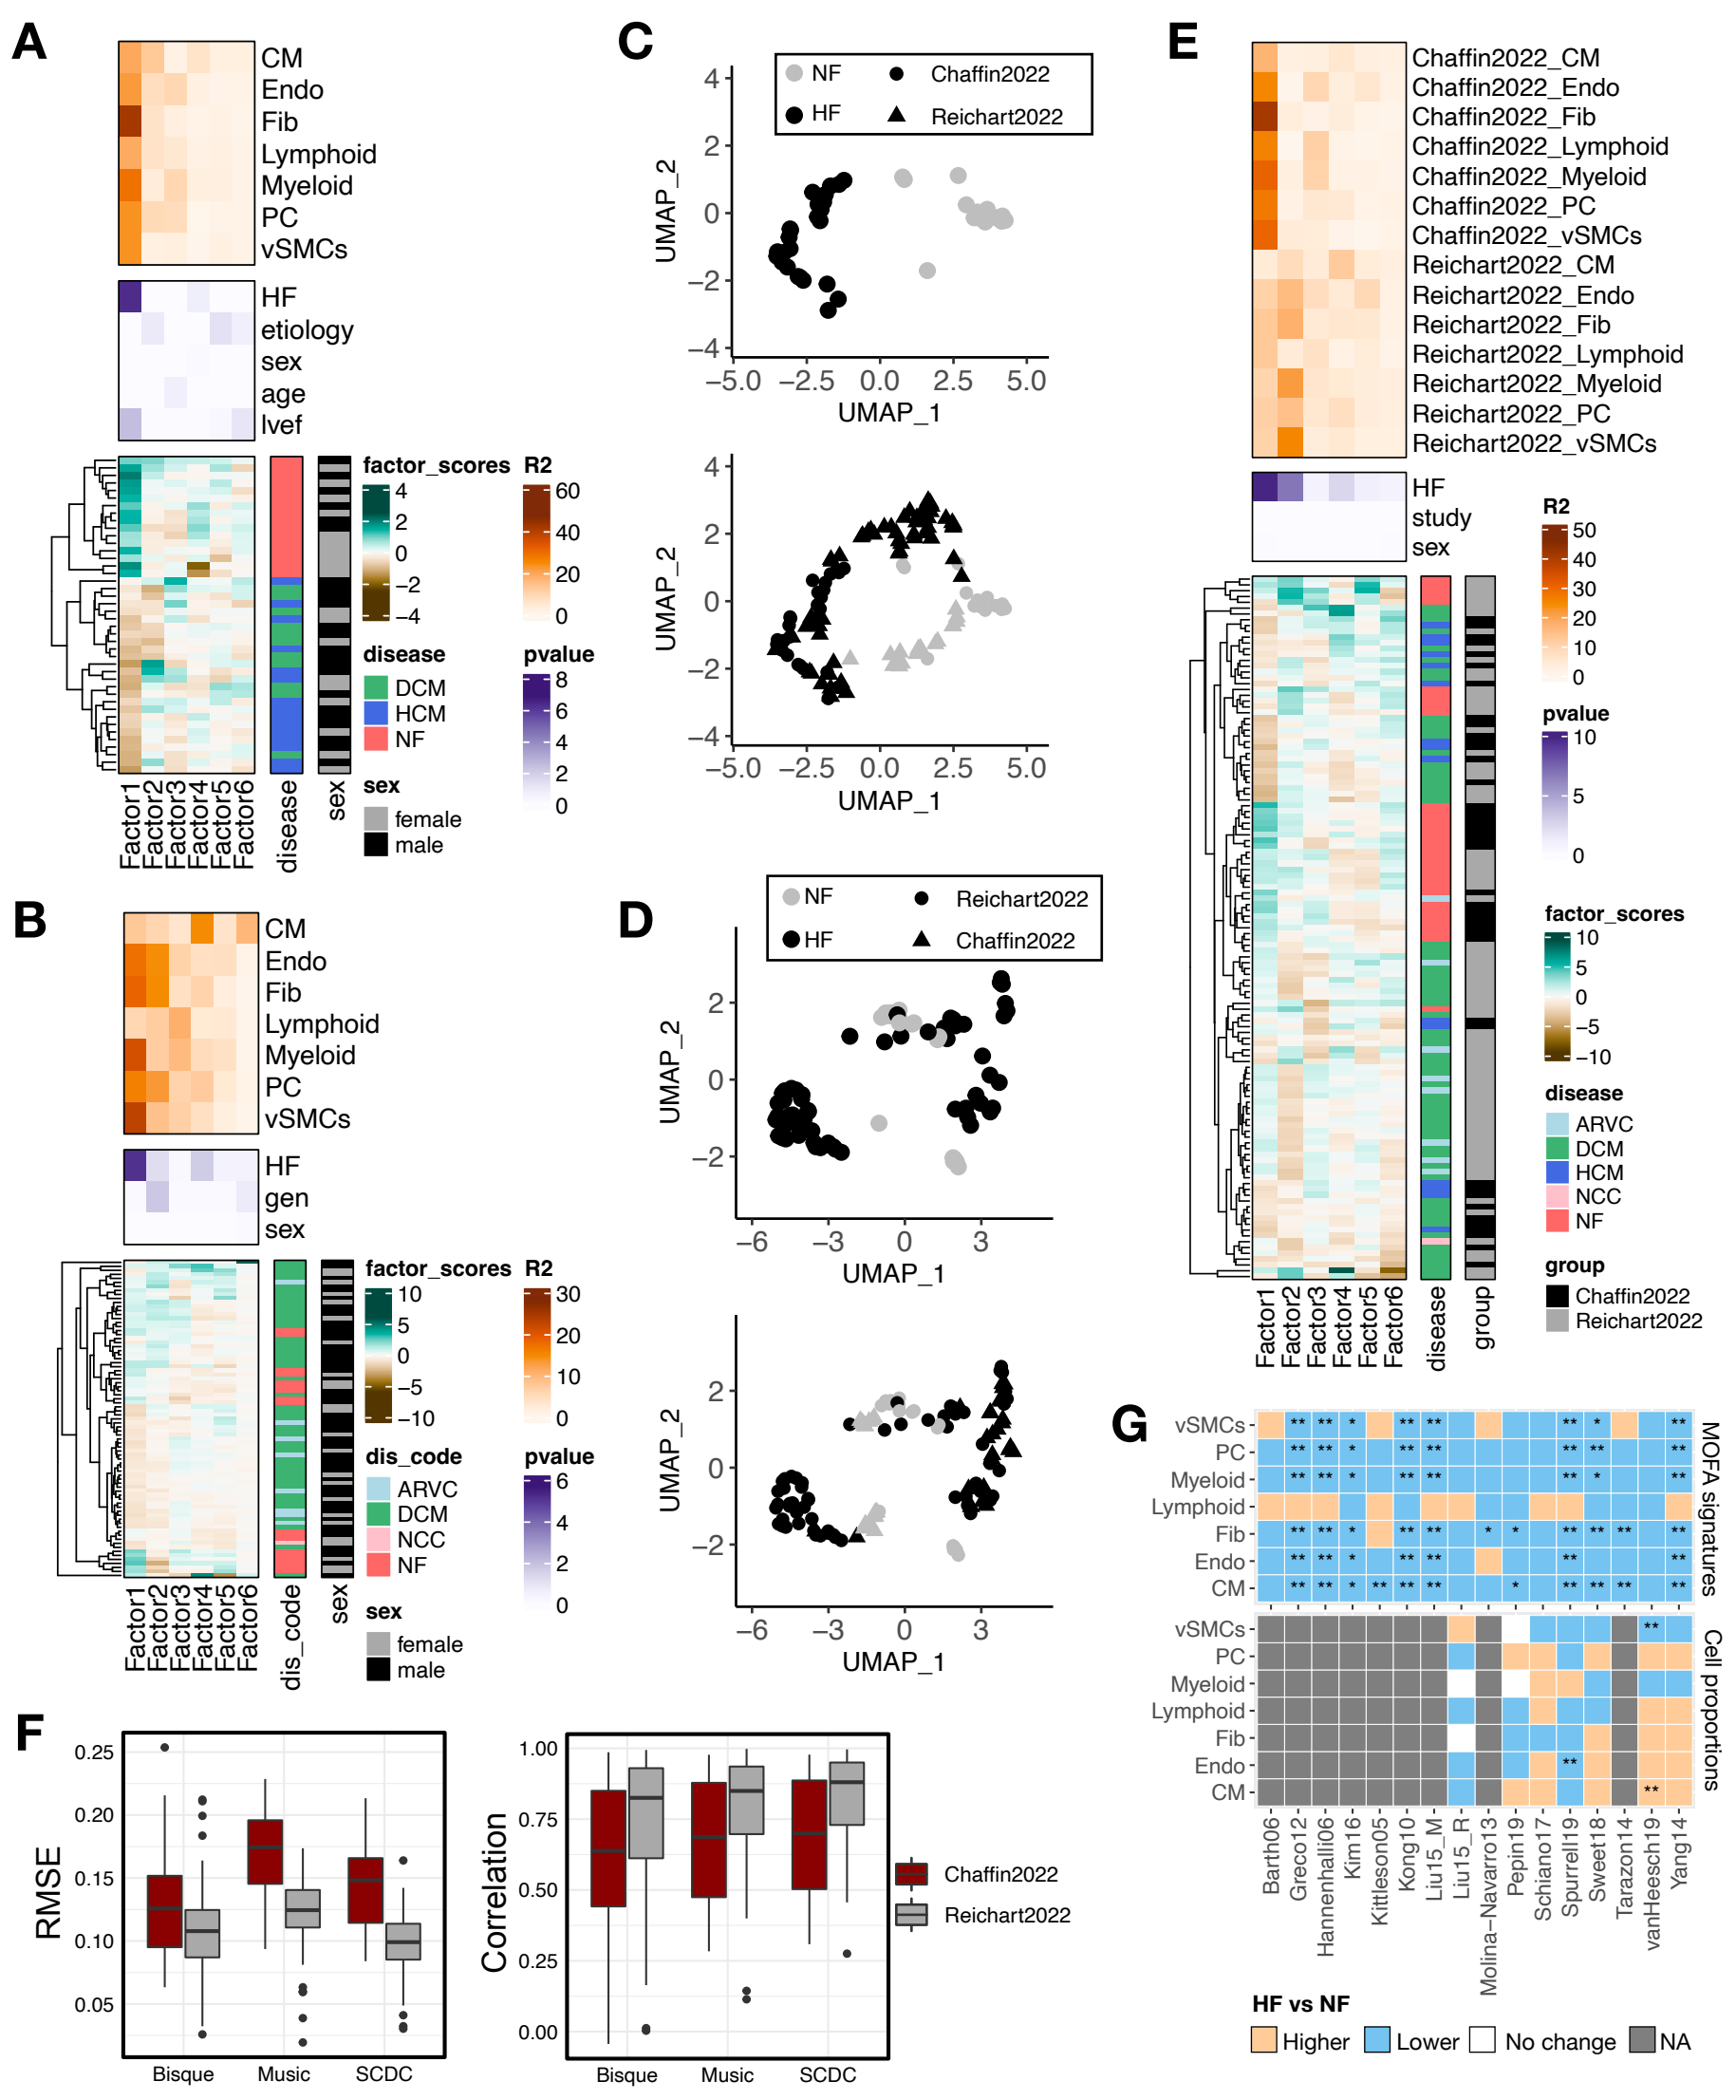

Supplement: supp [file elife-93161-supp-v1.zip]

**A**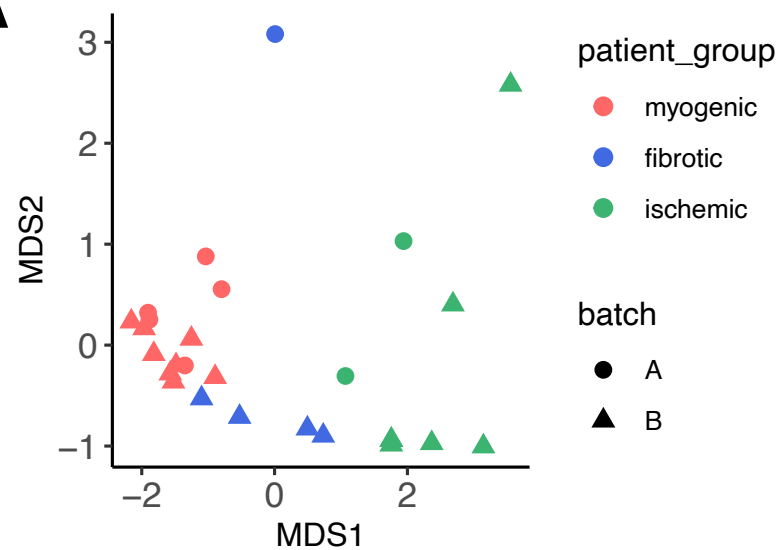**B**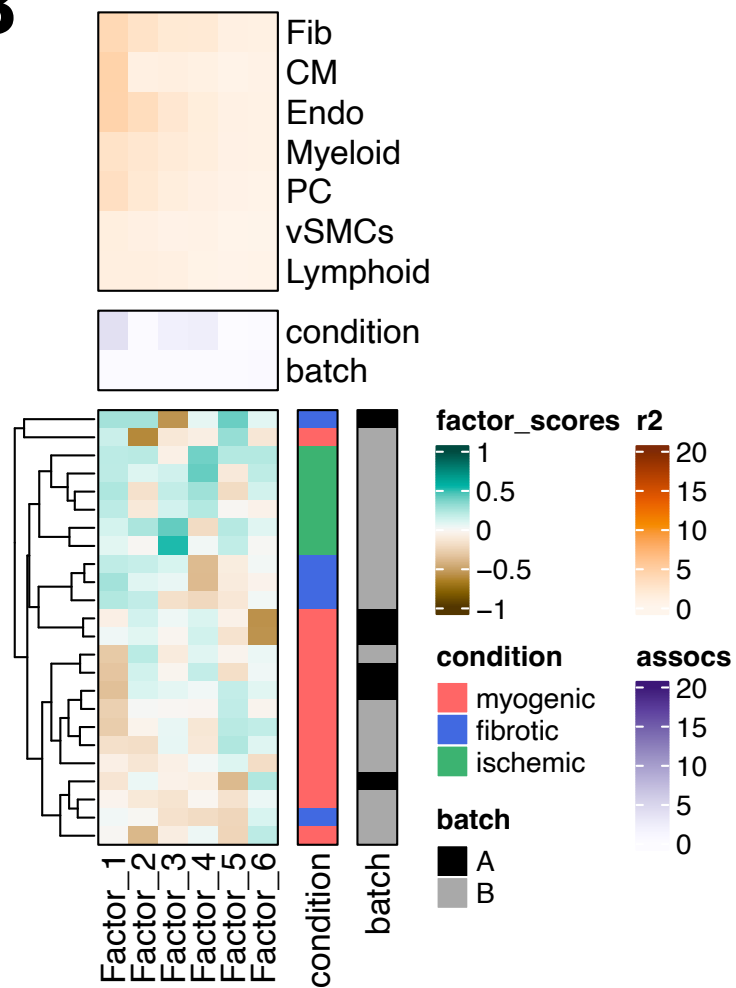**C**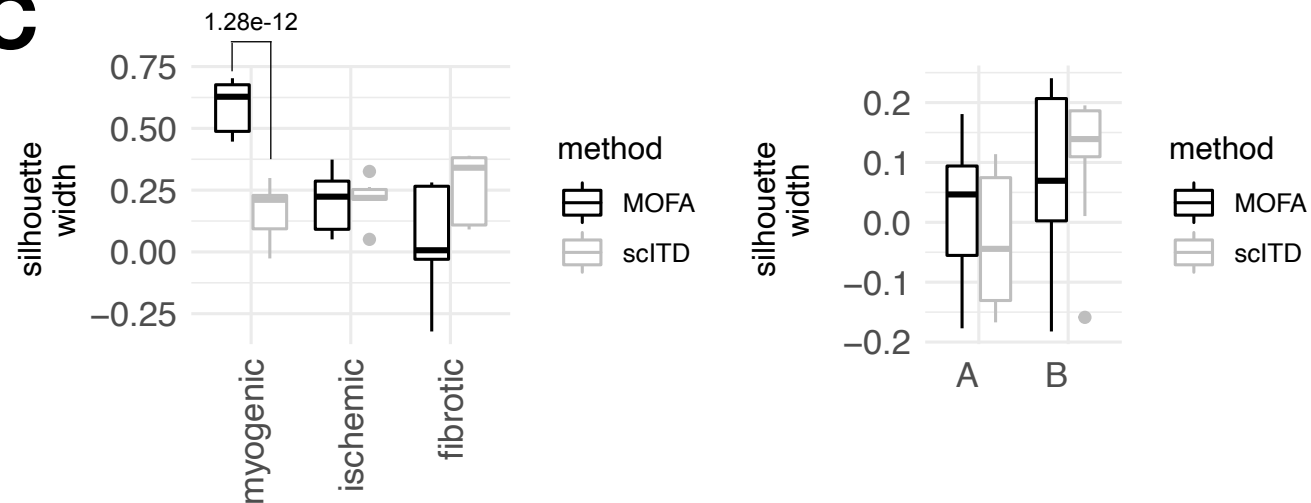**D**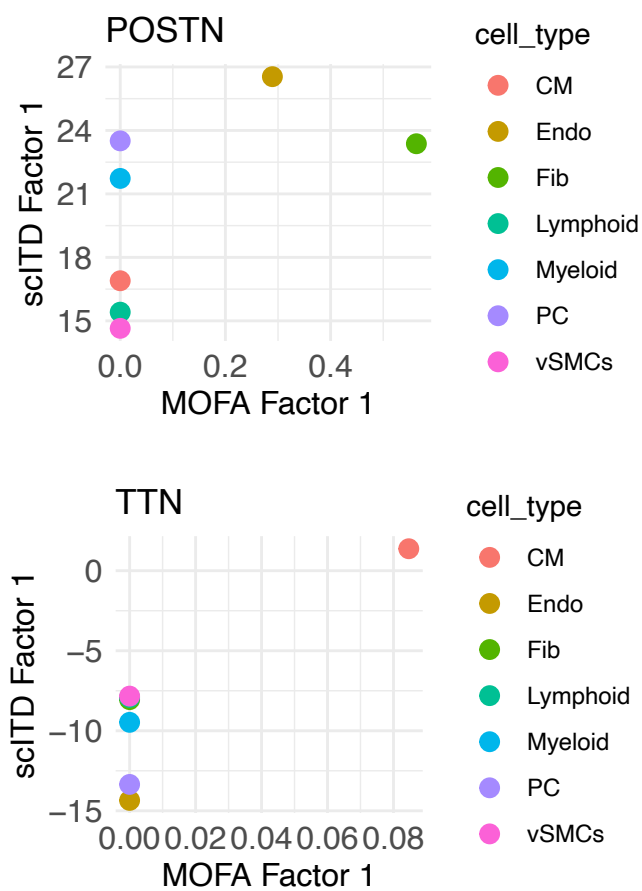**E**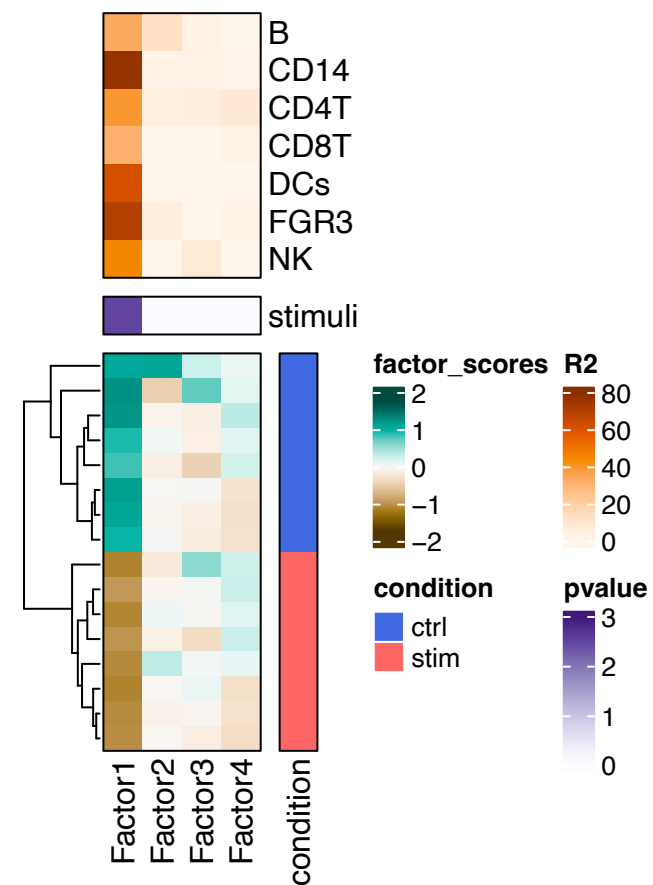

Supplement: supp [file elife-93161-supp-v1.zip]

**A**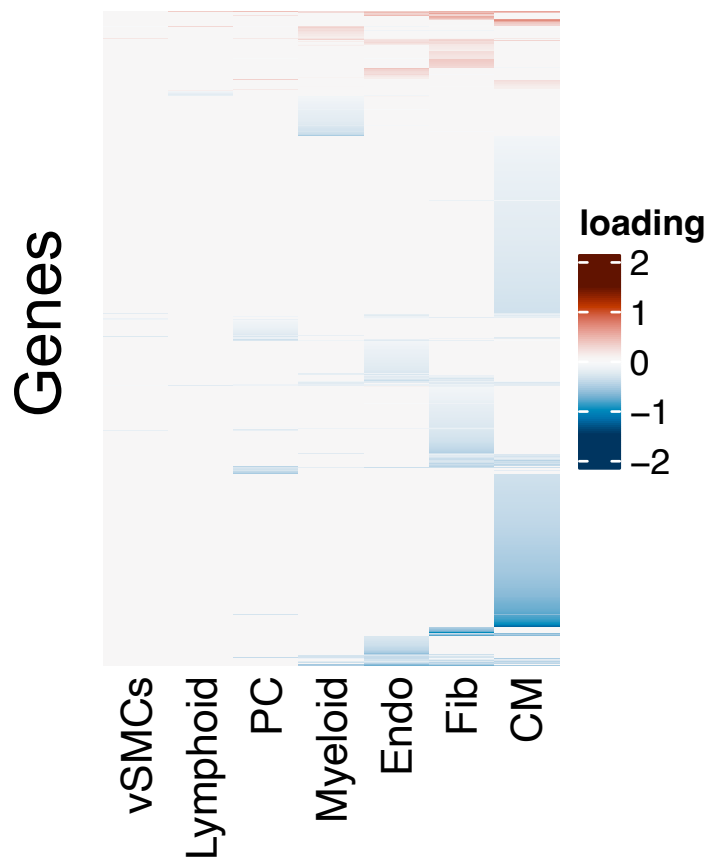**B**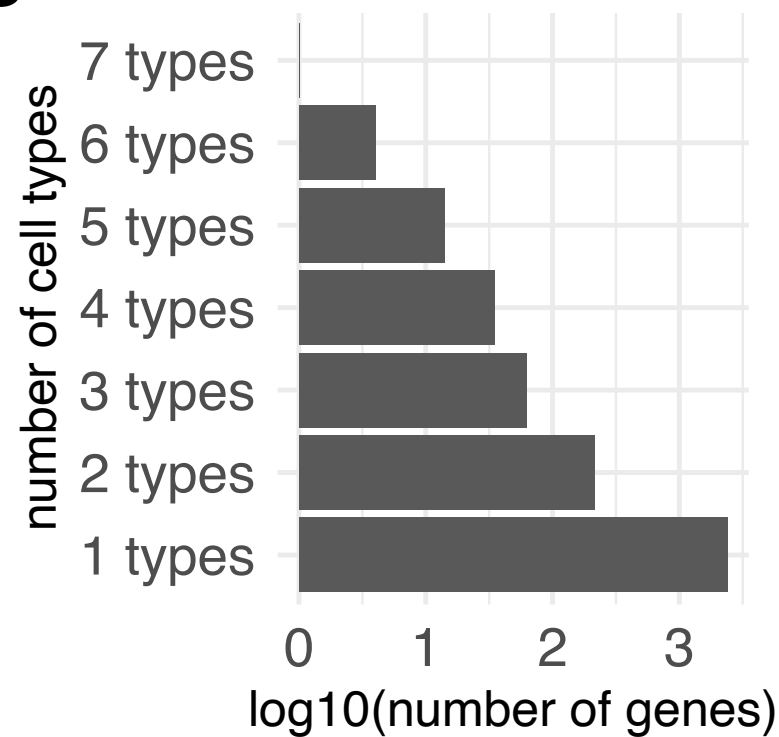**C**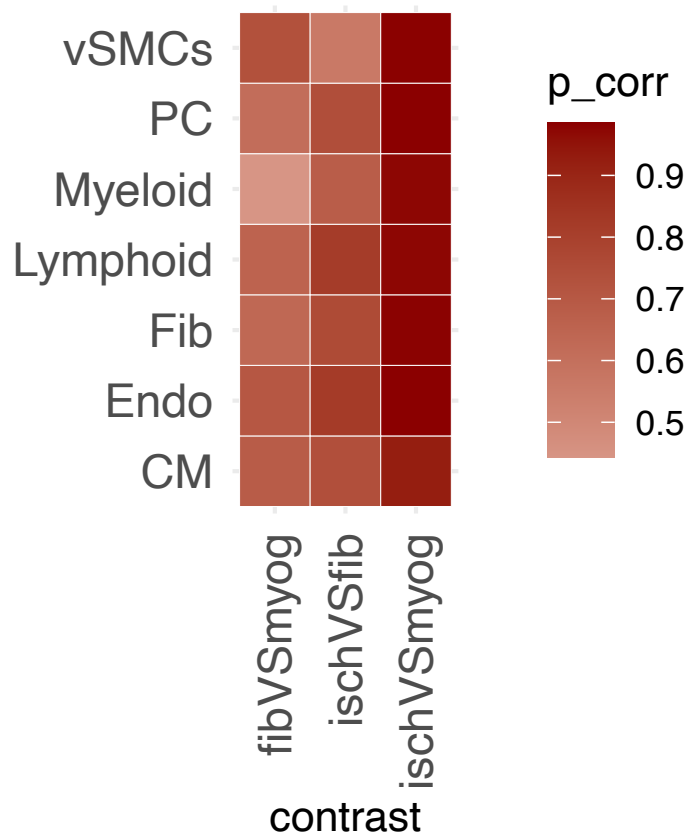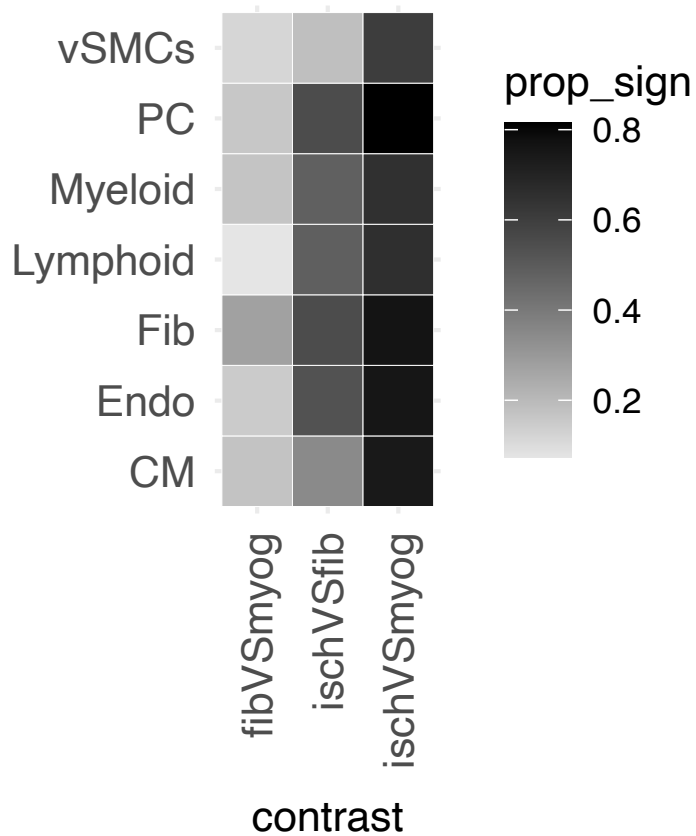

Supplement: supp [file elife-93161-supp-v1.zip]

**A**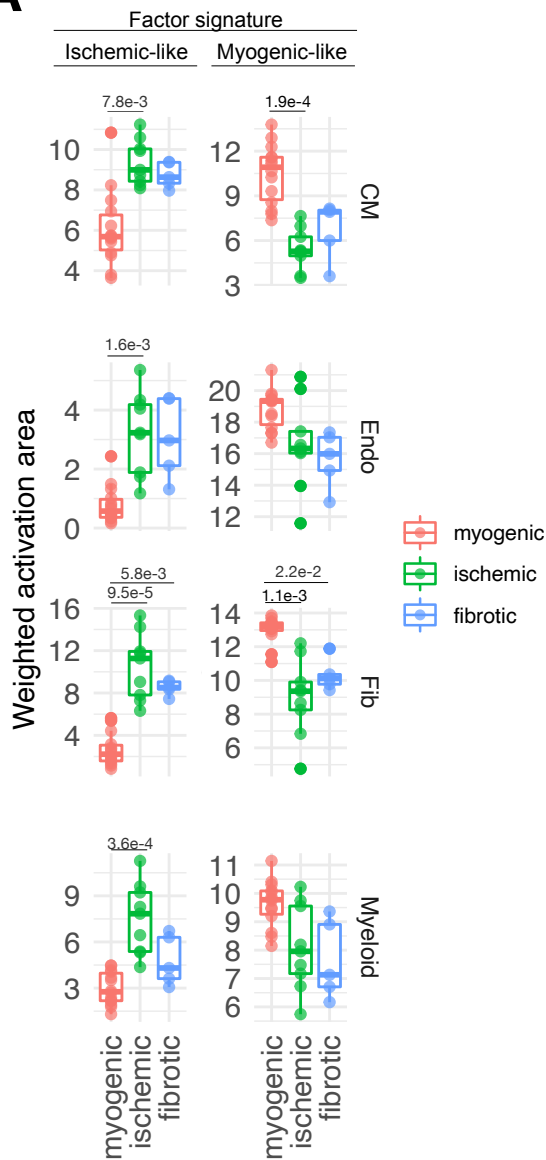**B**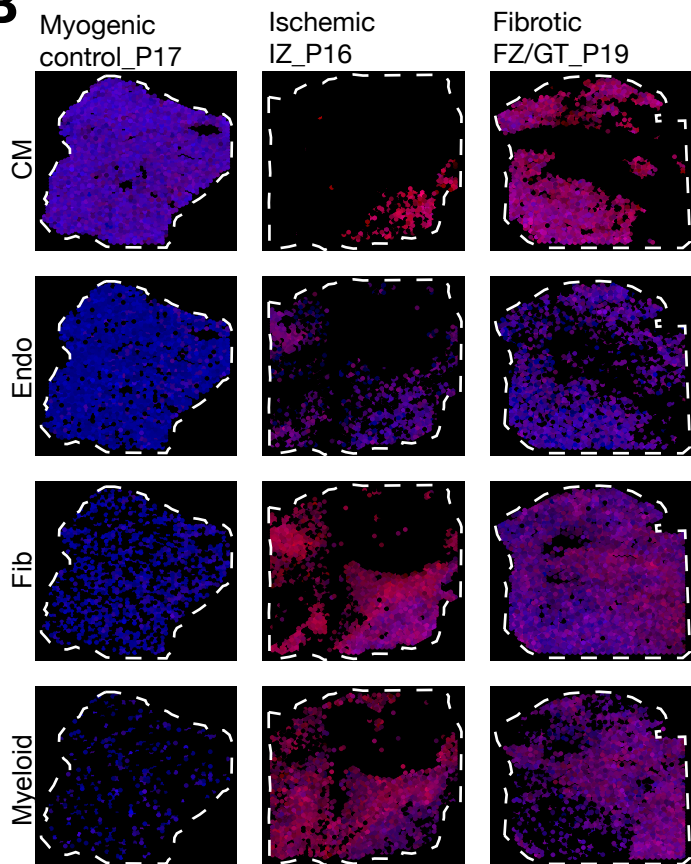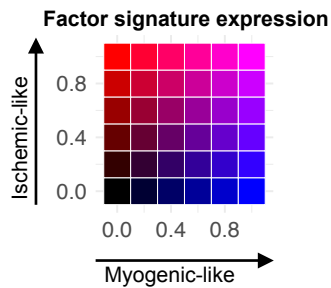

Supplement: supp [file elife-93161-supp-v1.zip]

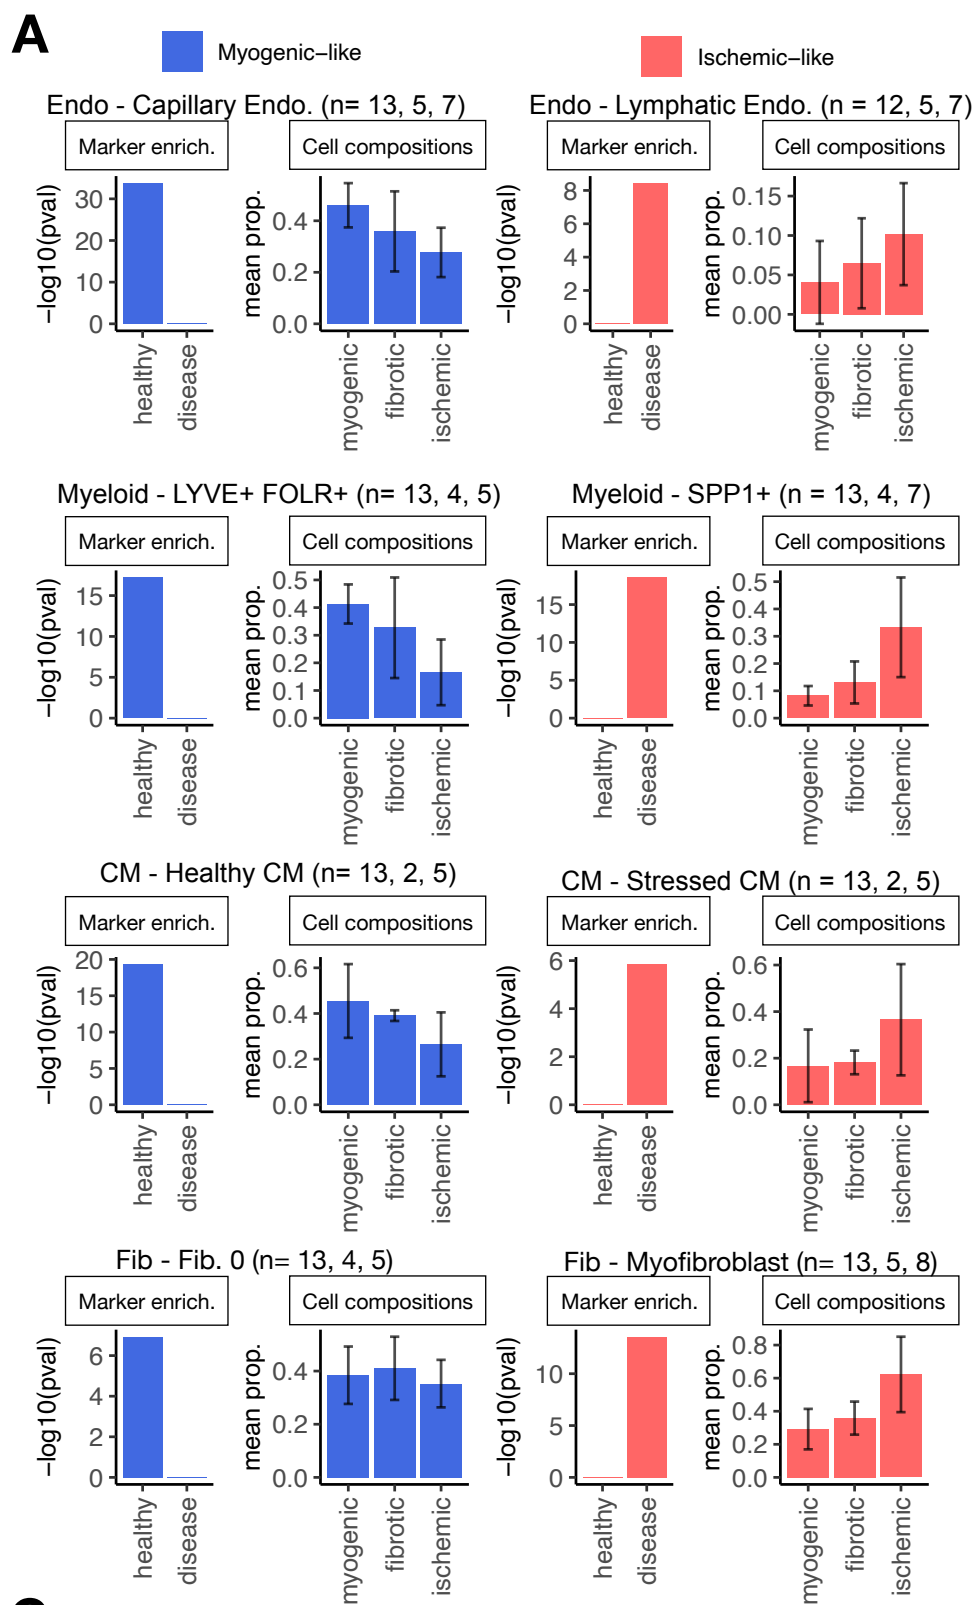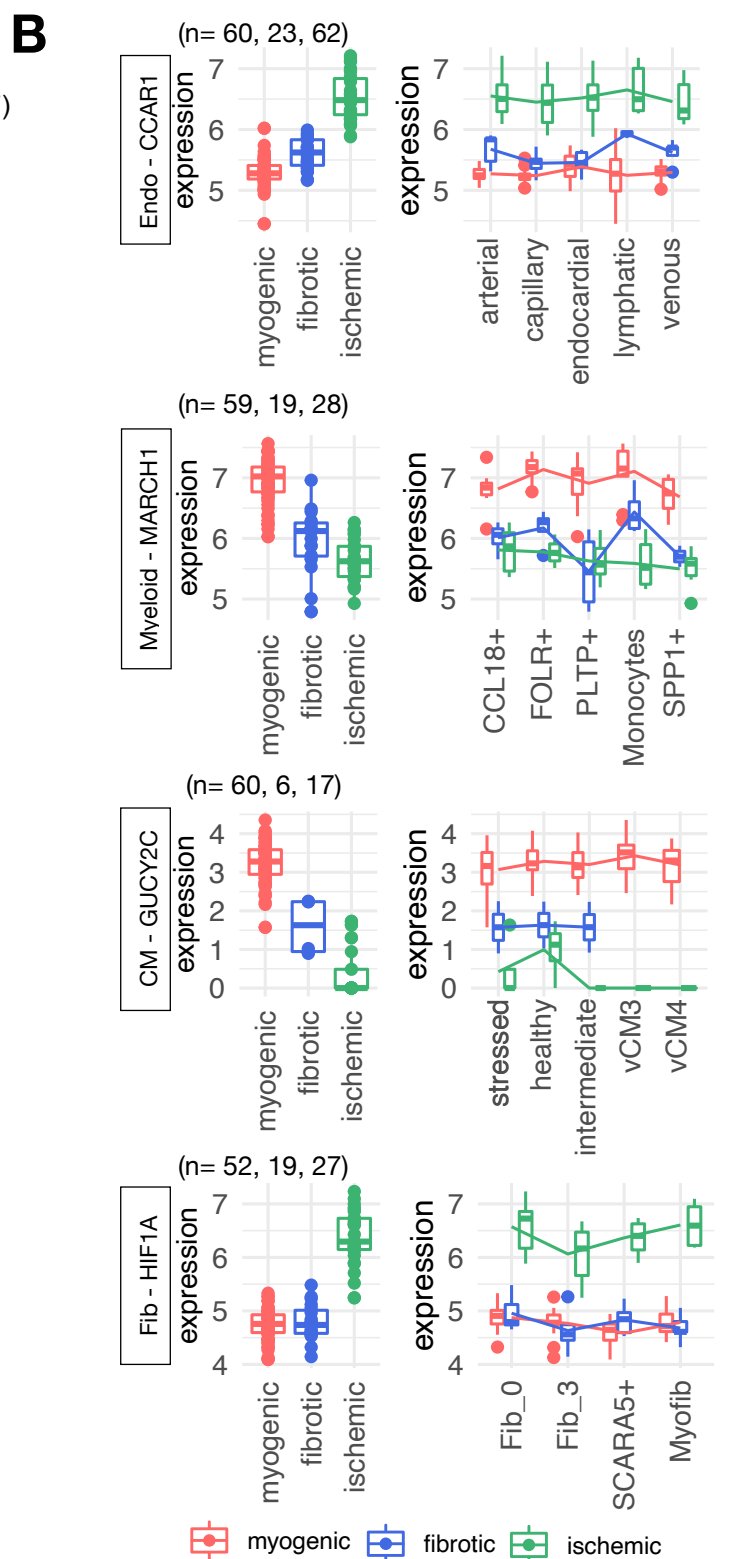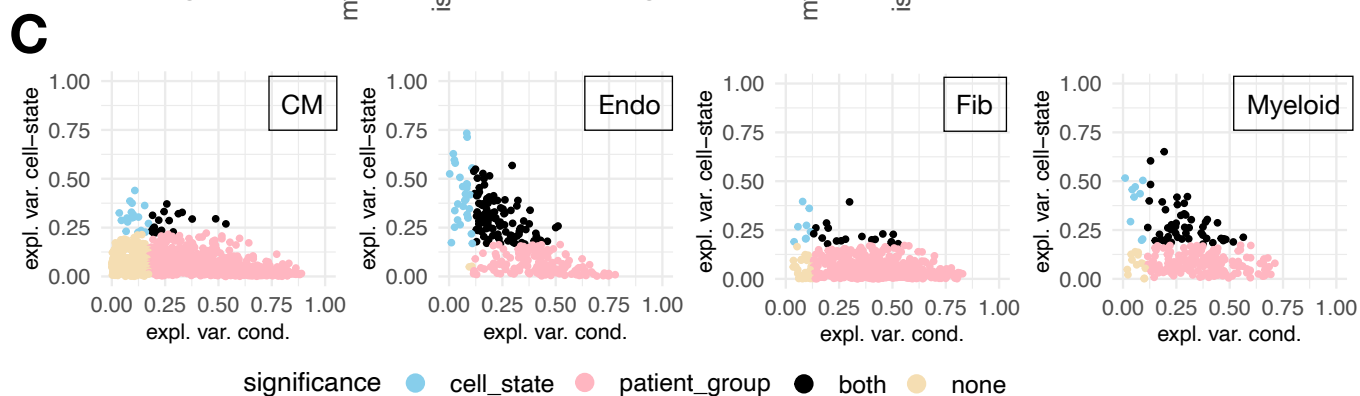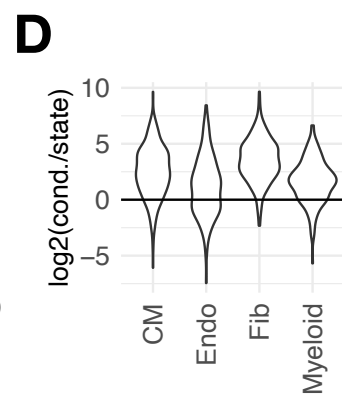

Supplement: supp [file elife-93161-supp-v1.zip]
